# Supplementary material for: Absence of first‐pass isolation is associated with poor pulmonary vein isolation durability and atrial fibrillation ablation outcomes
Source: PubMed Central journal article supplement (PMC8637089; doi:10.1002/joa3.12629), 2021-09-06

# Figure S1

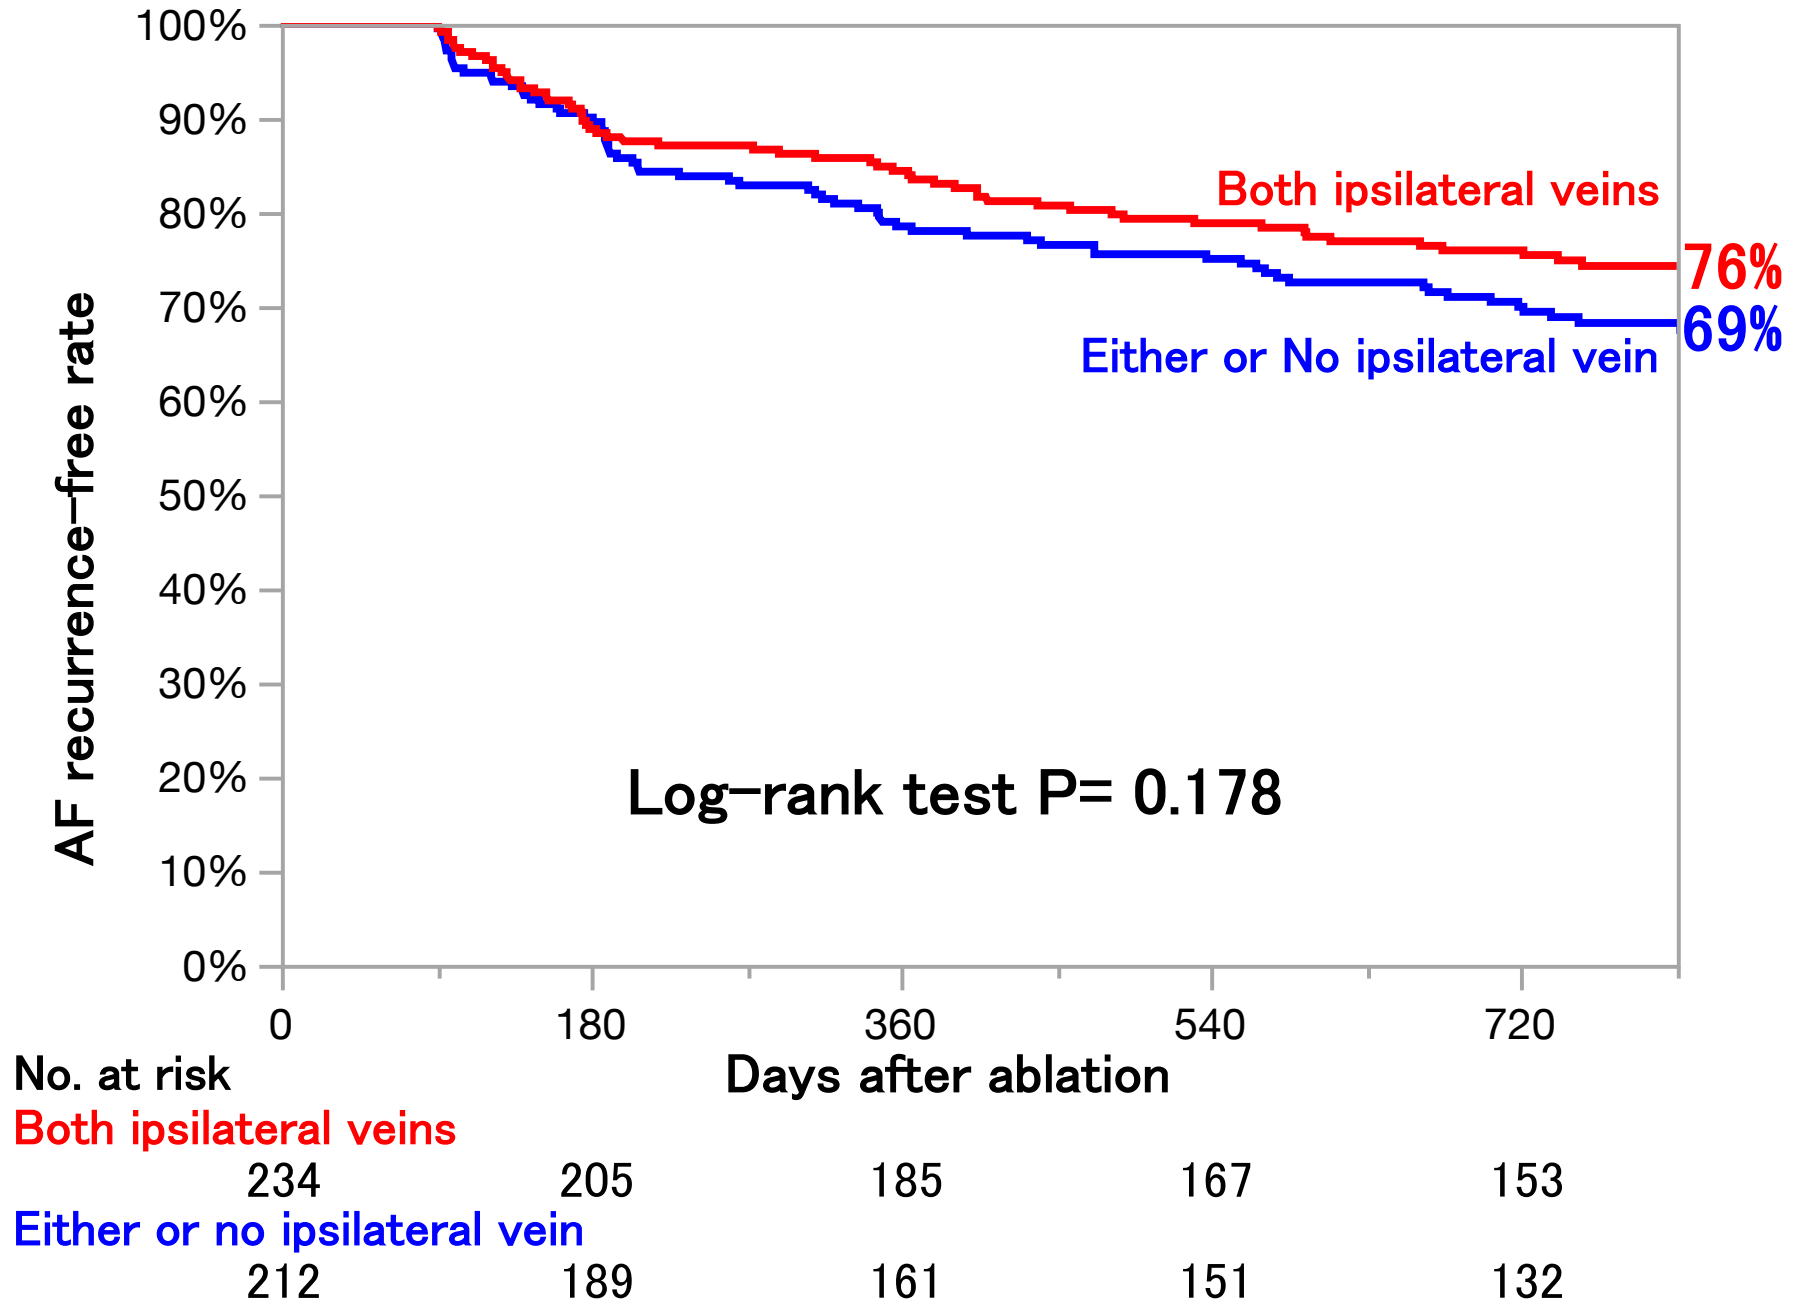

Supplement: JOA3-37-1468-s001.pdf [file JOA3-37-1468-s001.pdf]
